# Supplementary material
Source: MDPI journal article supplement (https://www.mdpi.com/2075-163X/9/5/325)
Supplement: s1 [file s1]

Table S3. LA-MC-ICPMS Lu-Yb-Hf isotopic results for the 91500 zircon.

| Spot No. | $^{176}\text{Hf}/^{177}\text{Hf}$ | 2SE<br>(ppm) | $^{178}\text{Hf}/^{177}\text{Hf}$ | 2SE<br>(ppm) | $^{176}\text{Lu}/^{177}\text{Hf}$ | 2SE<br>(%) | $^{176}\text{Yb}/^{177}\text{Hf}$ | 2SE<br>(%) |
|----------|-----------------------------------|--------------|-----------------------------------|--------------|-----------------------------------|------------|-----------------------------------|------------|
| 91500_1  | 0.282299                          | 106          | 1.467263                          | 50           | 0.00028                           | 0.08       | 0.0096                            | 0.83       |
| 91500_2  | 0.282298                          | 113          | 1.467214                          | 57           | 0.00028                           | 0.25       | 0.0095                            | 0.55       |
| 91500_3  | 0.282305                          | 110          | 1.467229                          | 48           | 0.00027                           | 0.08       | 0.0096                            | 0.89       |
| 91500_4  | 0.282288                          | 110          | 1.467199                          | 60           | 0.00027                           | 0.08       | 0.0096                            | 0.87       |
| 91500_5  | 0.282302                          | 113          | 1.467174                          | 53           | 0.00028                           | 0.11       | 0.0096                            | 0.80       |
| 91500_6  | 0.282294                          | 124          | 1.467180                          | 68           | 0.00027                           | 0.11       | 0.0096                            | 0.84       |
| 91500_7  | 0.282263                          | 106          | 1.467277                          | 62           | 0.00028                           | 0.08       | 0.0096                            | 0.82       |
| 91500_8  | 0.282295                          | 120          | 1.467154                          | 63           | 0.00028                           | 0.13       | 0.0096                            | 0.76       |
| 91500_9  | 0.282287                          | 110          | 1.467219                          | 58           | 0.00027                           | 0.13       | 0.0095                            | 0.70       |
| 91500_10 | 0.282306                          | 103          | 1.467247                          | 57           | 0.00026                           | 0.25       | 0.0092                            | 0.59       |
| 91500_11 | 0.282281                          | 117          | 1.467211                          | 55           | 0.00027                           | 0.07       | 0.0093                            | 0.68       |
| 91500_12 | 0.282291                          | 113          | 1.467263                          | 61           | 0.00027                           | 0.07       | 0.0094                            | 0.77       |
| 91500_13 | 0.282294                          | 96           | 1.467231                          | 58           | 0.00027                           | 0.10       | 0.0092                            | 0.78       |
| 91500_14 | 0.282262                          | 110          | 1.467318                          | 43           | 0.00009                           | 0.57       | 0.0027                            | 0.79       |
| 91500_15 | 0.282302                          | 120          | 1.467323                          | 43           | 0.00008                           | 0.31       | 0.0023                            | 0.75       |
| 91500_16 | 0.282289                          | 110          | 1.467378                          | 50           | 0.00009                           | 0.37       | 0.0027                            | 0.70       |
| 91500_17 | 0.282283                          | 113          | 1.467352                          | 52           | 0.00010                           | 0.23       | 0.0029                            | 0.65       |
| 91500_18 | 0.282296                          | 128          | 1.467374                          | 42           | 0.00011                           | 0.23       | 0.0033                            | 0.66       |
| 91500_19 | 0.282282                          | 124          | 1.467330                          | 44           | 0.00013                           | 0.27       | 0.0037                            | 0.60       |
| 91500_20 | 0.282289                          | 124          | 1.467299                          | 42           | 0.00013                           | 0.29       | 0.0036                            | 0.69       |
| 91500_21 | 0.282304                          | 135          | 1.467322                          | 46           | 0.00035                           | 0.16       | 0.0096                            | 0.38       |
| 91500_22 | 0.282295                          | 131          | 1.467276                          | 45           | 0.00033                           | 0.10       | 0.0094                            | 0.42       |
| 91500_23 | 0.282355                          | 135          | 1.467376                          | 47           | 0.00033                           | 0.09       | 0.0095                            | 0.45       |
| 91500_24 | 0.282323                          | 145          | 1.467360                          | 47           | 0.00034                           | 0.26       | 0.0097                            | 0.38       |
| 91500_25 | 0.282314                          | 145          | 1.467342                          | 45           | 0.00033                           | 0.16       | 0.0095                            | 0.44       |
| 91500_26 | 0.282312                          | 163          | 1.467310                          | 48           | 0.00034                           | 0.28       | 0.0097                            | 0.30       |
| 91500_27 | 0.282307                          | 166          | 1.467313                          | 46           | 0.00033                           | 0.13       | 0.0096                            | 0.46       |
| 91500_28 | 0.282286                          | 142          | 1.467288                          | 46           | 0.00028                           | 0.21       | 0.0080                            | 0.44       |
| 91500_29 | 0.282329                          | 145          | 1.467271                          | 42           | 0.00028                           | 0.13       | 0.0079                            | 0.58       |
| 91500_30 | 0.282289                          | 152          | 1.467336                          | 61           | 0.00028                           | 0.11       | 0.0081                            | 0.48       |
| 91500_31 | 0.282333                          | 135          | 1.467331                          | 41           | 0.00028                           | 0.14       | 0.0079                            | 0.43       |
| 91500_32 | 0.282298                          | 152          | 1.467352                          | 44           | 0.00028                           | 0.26       | 0.0078                            | 0.44       |
| 91500_33 | 0.282308                          | 142          | 1.467290                          | 44           | 0.00027                           | 0.29       | 0.0077                            | 0.36       |
| 91500_34 | 0.282256                          | 152          | 1.467298                          | 43           | 0.00028                           | 0.14       | 0.0080                            | 0.44       |
| 91500_35 | 0.282269                          | 159          | 1.467258                          | 40           | 0.00043                           | 0.11       | 0.0129                            | 0.46       |
| 91500_36 | 0.282258                          | 170          | 1.467295                          | 46           | 0.00043                           | 0.10       | 0.0128                            | 0.37       |
| 91500_37 | 0.282261                          | 167          | 1.467304                          | 42           | 0.00042                           | 0.10       | 0.0125                            | 0.50       |
| 91500_38 | 0.282297                          | 181          | 1.467299                          | 46           | 0.00043                           | 0.09       | 0.0129                            | 0.50       |
| 91500_39 | 0.282314                          | 181          | 1.467368                          | 48           | 0.00043                           | 0.10       | 0.0129                            | 0.48       |
| 91500_40 | 0.282266                          | 170          | 1.467273                          | 45           | 0.00044                           | 0.09       | 0.0128                            | 0.54       |
| 91500_41 | 0.282270                          | 152          | 1.467347                          | 45           | 0.00045                           | 0.08       | 0.0131                            | 0.46       |
| Average  | 0.282294                          |              | 1.467289                          |              | 0.00028                           |            | 0.0087                            |            |
| SD       | 0.000021                          |              | 0.000059                          |              | 0.00010                           |            | 0.0030                            |            |
