# Supplementary material
Source: MDPI journal article supplement (https://www.mdpi.com/2075-163X/9/5/325)
Supplement: s1 [file s1]

Table S4. LA-ICPMS results for the 91500 and LKZ-1 zircons (unit: ppm).

| spot No.  | P  | Ca  | Y   | La      | Ce   | Pr    | Nd    | Sm    | Eu    | Gd   | Tb   | Dy   | Ho  | Er   | Tm  | Yb    | Lu   | Hf   | Th  | U   |
|-----------|----|-----|-----|---------|------|-------|-------|-------|-------|------|------|------|-----|------|-----|-------|------|------|-----|-----|
| 91500-1-2 | 13 | 296 | 196 | 0.002   | 3.41 | 0.018 | 0.087 | 0.724 | 0.420 | 3.11 | 1.03 | 14.9 | 6.4 | 33.4 | 8.6 | 80.7  | 16.3 | 5998 | 35  | 93  |
| 91500-1-3 | 31 | -   | 197 | 0.002   | 2.57 | 0.008 | 0.601 | 0.754 | 0.334 | 3.11 | 1.25 | 16.4 | 6.8 | 36.4 | 8.6 | 90.6  | 17.6 | 5826 | 36  | 100 |
| 91500-2-1 | 12 | 78  | 199 | 0.002   | 2.68 | 0.016 | 0.266 | 0.726 | 0.309 | 3.35 | 1.12 | 15.4 | 6.4 | 35.2 | 8.7 | 88.8  | 17.6 | 5779 | 20  | 68  |
| 91500-2-2 | 15 | 51  | 110 | -       | 1.73 | 0.004 | 0.114 | 0.322 | 0.129 | 1.71 | 0.59 | 8.7  | 3.8 | 21.7 | 5.2 | 58.4  | 11.0 | 6008 | 20  | 67  |
| 91500-3-1 | 15 | -   | 110 | -       | 1.79 | 0.008 | 0.183 | 0.335 | 0.146 | 1.51 | 0.62 | 8.3  | 3.6 | 20.9 | 5.1 | 56.5  | 11.0 | 5806 | 28  | 84  |
| 91500-3-2 | 9  | -   | 133 | 0.004   | 2.45 | 0.098 | 0.248 | 0.479 | 0.234 | 2.49 | 0.82 | 10.1 | 4.4 | 25.8 | 6.3 | 61.8  | 13.2 | 6158 | 24  | 72  |
| 91500-8   | 8  | -   | 137 | 0.010   | 2.12 | 0.008 | 0.261 | 0.416 | 0.262 | 2.27 | 0.66 | 10.1 | 4.4 | 23.7 | 6.0 | 60.8  | 12.3 | 5608 | 27  | 78  |
| 91500-9   | 4  | 102 | 110 | 0.0001  | 1.83 | 0.003 | 0.101 | 0.294 | 0.159 | 1.51 | 0.65 | 7.3  | 3.2 | 18.9 | 4.7 | 49.4  | 10.3 | 5427 | 18  | 60  |
| 91500-10  | 20 | 45  | 177 | 0.001   | 2.51 | 0.019 | 0.379 | 0.581 | 0.327 | 2.99 | 1.15 | 14.9 | 6.2 | 34.7 | 8.2 | 86.1  | 17.6 | 6166 | 37  | 93  |
| 91500-17  | 19 | 50  | 150 | 0.0003  | 2.46 | 0.011 | 0.183 | 0.668 | 0.258 | 2.63 | 1.03 | 13.4 | 5.2 | 29.1 | 7.4 | 68.7  | 14.3 | 6066 | 32  | 84  |
| 91500-18  | 17 | 115 | 104 | 0.001   | 1.96 | 0.004 | 0.189 | 0.508 | 0.133 | 1.46 | 0.56 | 7.5  | 3.6 | 19.7 | 5.0 | 50.0  | 10.5 | 5461 | 22  | 69  |
| 91500-19  | 15 | 44  | 183 | 0.003   | 2.71 | 0.012 | 0.320 | 0.426 | 0.262 | 2.89 | 1.18 | 14.2 | 6.1 | 32.4 | 8.4 | 83.5  | 16.6 | 5635 | 36  | 97  |
| 91500-66  | 16 | 175 | 124 | -       | 2.23 | 0.004 | 0.107 | 0.399 | 0.244 | 1.78 | 0.79 | 10.1 | 4.1 | 23.2 | 5.9 | 57.5  | 11.7 | 5417 | 31  | 86  |
| 91500-67  | 8  | 69  | 113 | 0.00004 | 2.10 | 0.003 | 0.171 | 0.245 | 0.131 | 1.71 | 0.63 | 8.9  | 3.7 | 20.6 | 5.4 | 54.9  | 11.0 | 5779 | 25  | 76  |
| 91500-68  | 23 | -   | 123 | 0.002   | 2.14 | 0.013 | 0.286 | 0.396 | 0.217 | 2.03 | 0.72 | 10.1 | 4.2 | 22.5 | 5.4 | 55.5  | 11.4 | 5265 | 32  | 92  |
| 91500-70  | 4  | 88  | 173 | 0.022   | 2.48 | 0.033 | 0.357 | 0.571 | 0.300 | 3.05 | 1.08 | 13.9 | 6.1 | 31.7 | 7.9 | 78.0  | 15.3 | 5450 | 38  | 103 |
| 91500-72  | 23 | 122 | 198 | 0.002   | 2.13 | 0.021 | 0.410 | 0.911 | 0.387 | 3.90 | 1.56 | 18.1 | 6.9 | 40.0 | 9.8 | 103.1 | 19.7 | 6718 | 36  | 89  |
| 91500-73  | 14 | 25  | 194 | 0.0002  | 2.36 | 0.021 | 0.387 | 0.900 | 0.451 | 4.16 | 1.47 | 18.0 | 7.0 | 38.5 | 9.5 | 101.4 | 19.0 | 6281 | 37  | 93  |
| 91500-74  | 4  | -   | 194 | 0.004   | 2.11 | 0.021 | 0.309 | 0.866 | 0.442 | 3.83 | 1.58 | 17.4 | 6.8 | 38.9 | 9.5 | 100.1 | 18.7 | 6067 | 33  | 82  |
| 91500-75  | 11 | 40  | 132 | 0.002   | 2.52 | 0.006 | 0.143 | 0.469 | 0.273 | 1.96 | 0.89 | 11.1 | 4.7 | 26.2 | 6.3 | 70.5  | 13.4 | 6206 | 36  | 100 |
| 91500-76  | 21 | 42  | 130 | 0.003   | 2.36 | 0.015 | 0.190 | 0.320 | 0.264 | 2.13 | 0.80 | 11.0 | 4.3 | 24.2 | 6.3 | 67.0  | 12.9 | 5830 | 35  | 104 |
| 91500-88  | 9  | 99  | 195 | 0.005   | 2.04 | 0.021 | 0.325 | 0.907 | 0.324 | 3.43 | 1.25 | 15.6 | 6.7 | 34.3 | 9.1 | 90.0  | 17.3 | 5641 | 32  | 85  |
| 91500-89  | 17 | -   | 189 | -       | 2.43 | 0.015 | 0.575 | 0.995 | 0.455 | 3.98 | 1.41 | 15.8 | 6.6 | 35.1 | 8.9 | 86.8  | 17.4 | 5967 | 35  | 87  |
| 91500-90  | 16 | 95  | 124 | -       | 2.24 | 0.009 | 0.165 | 0.360 | 0.187 | 2.05 | 0.85 | 9.6  | 4.3 | 22.0 | 5.8 | 57.8  | 11.3 | 5325 | 35  | 99  |
| 91500-91  | 20 | 64  | 128 | 0.002   | 2.24 | 0.011 | 0.083 | 0.376 | 0.167 | 1.86 | 0.80 | 9.6  | 3.9 | 23.0 | 5.7 | 59.3  | 11.4 | 5219 | 34  | 102 |
| 91500-102 | 12 | 106 | 192 | -       | 2.02 | 0.020 | 0.457 | 0.968 | 0.397 | 3.62 | 1.38 | 17.1 | 7.0 | 36.7 | 8.8 | 93.4  | 18.0 | 5964 | 35  | 86  |
| 91500-103 | -  | -   | 197 | 0.003   | 2.06 | 0.023 | 0.410 | 0.833 | 0.423 | 4.20 | 1.33 | 15.0 | 6.2 | 32.1 | 8.1 | 84.1  | 15.9 | 5420 | 36  | 89  |
| 91500-104 | -  | 144 | 193 | 0.0001  | 1.92 | 0.020 | 0.458 | 0.664 | 0.407 | 3.76 | 1.20 | 15.1 | 6.5 | 33.8 | 8.2 | 89.0  | 16.5 | 5613 | 30  | 75  |
| 91500-108 | 24 | 89  | 120 | 0.071   | 2.02 | 0.017 | 0.044 | 0.571 | 0.163 | 1.95 | 0.74 | 9.4  | 3.8 | 21.5 | 5.9 | 54.0  | 11.6 | 5899 | 30  | 88  |
| 91500-109 | 17 | -   | 126 | 0.060   | 2.01 | 0.015 | 0.364 | 0.505 | 0.258 | 2.03 | 0.87 | 10.2 | 4.3 | 22.3 | 5.8 | 54.0  | 12.0 | 5928 | 35  | 98  |
| 91500-110 | 31 | 89  | 118 | 0.063   | 1.96 | 0.013 | 0.153 | 0.226 | 0.132 | 1.98 | 0.59 | 8.0  | 3.4 | 19.9 | 5.0 | 46.2  | 10.1 | 5463 | 27  | 81  |
| 91500-111 | 6  | 275 | 125 | 0.050   | 2.09 | 0.021 | 0.193 | 0.295 | 0.199 | 2.00 | 0.83 | 9.3  | 3.7 | 24.3 | 5.4 | 53.2  | 11.3 | 5573 | 28  | 85  |
| 91500-121 | 17 | -   | 111 | 0.002   | 1.81 | 0.007 | 0.233 | 0.263 | 0.207 | 1.57 | 0.74 | 9.5  | 3.8 | 22.0 | 5.5 | 56.4  | 11.9 | 6128 | 25  | 60  |
| 91500-122 | 5  | 115 | 120 | 0.087   | 1.99 | 0.146 | 0.128 | 0.306 | 0.297 | 1.53 | 0.65 | 8.2  | 3.6 | 18.1 | 5.5 | 53.6  | 11.2 | 5632 | 24  | 57  |
| 91500-123 | 11 | -   | 115 | 0.002   | 1.86 | 0.010 | 0.117 | 0.298 | 0.104 | 1.45 | 0.64 | 9.2  | 3.3 | 20.6 | 5.9 | 62.1  | 12.8 | 6245 | 26  | 68  |
| 91500-124 | 15 | 139 | 112 | 0.001   | 1.71 | 0.007 | 0.139 | 0.125 | 0.110 | 1.68 | 0.62 | 8.5  | 3.3 | 19.2 | 5.1 | 48.1  | 9.9  | 5365 | 30  | 62  |
| 91500-125 | 5  | -   | 114 | 0.003   | 1.89 | 0.006 | 0.200 | 0.291 | 0.247 | 1.70 | 0.80 | 8.1  | 3.6 | 19.0 | 5.0 | 54.8  | 10.8 | 5915 | 24  | 61  |
| Average   | 14 | 102 | 148 | 0.013   | 2.19 | 0.019 | 0.252 | 0.521 | 0.264 | 2.50 | 0.94 | 11.8 | 4.9 | 27.1 | 6.8 | 69.4  | 13.8 | 5780 | 30  | 83  |
| SD        | 7  | 66  | 36  | 0.025   | 0.34 | 0.027 | 0.140 | 0.243 | 0.106 | 0.90 | 0.31 | 3.4  | 1.4 | 7.0  | 1.6 | 17.4  | 3.1  | 340  | 6   | 14  |
|           |    |     |     |         |      |       |       |       |       |      |      |      |     |      |     |       |      |      |     |     |
| LKZ-4-1   | 18 | -   | 92  | 0.004   | 0.89 | 0.015 | 0.197 | 0.375 | 0.129 | 1.55 | 0.66 | 8.8  | 3.5 | 18.1 | 4.3 | 38.6  | 7.2  | 8798 | 94  | 672 |
| LKZ-4-2   | 31 | -   | 93  | 0.002   | 0.81 | 0.019 | 0.152 | 0.248 | 0.113 | 2.00 | 0.66 | 8.1  | 3.3 | 16.6 | 4.0 | 37.2  | 6.4  | 7755 | 91  | 633 |
| LKZ-5-1   | 8  | 144 | 90  | 0.004   | 0.66 | 0.011 | 0.151 | 0.090 | 0.140 | 1.70 | 0.71 | 7.8  | 3.3 | 16.9 | 3.8 | 34.1  | 6.4  | 8024 | 96  | 666 |
| LKZ-5-2   | -  | -   | 86  | -       | 0.78 | 0.015 | 0.189 | 0.382 | 0.094 | 1.63 | 0.67 | 7.3  | 2.8 | 15.3 | 3.4 | 32.7  | 5.9  | 7857 | 95  | 691 |
| LKZ-6-1   | 19 | 2   | 96  | -       | 1.02 | 0.009 | 0.162 | 0.392 | 0.137 | 1.60 | 0.68 | 8.3  | 3.3 | 17.7 | 4.1 | 37.8  | 6.8  | 7996 | 103 | 718 |
| LKZ-6-2   | -  | -   | 98  | 0.006   | 0.78 | 0.014 | 0.086 | 0.300 | 0.070 | 1.78 | 0.72 | 8.6  | 3.6 | 17.6 | 3.7 | 36.2  | 6.3  | 7888 | 108 | 717 |
| LKZ-7-1   | 15 | -   | 79  | 0.003   | 0.83 | 0.015 | 0.194 | 0.379 | 0.061 | 1.23 | 0.52 | 6.4  | 2.7 | 14.4 | 3.2 | 29.3  | 5.4  | 7495 | 82  | 605 |
| LKZ-7-2   | 17 | -   | 84  | 0.002   | 0.79 | 0.010 | 0.141 | 0.199 | 0.061 | 1.31 | 0.53 | 6.5  | 2.7 | 14.2 | 3.1 | 29.1  | 5.1  | 7538 | 91  | 658 |
| LKZ-11-1  | 17 | -   | 89  | 0.002   | 0.80 | 0.011 | 0.182 | 0.211 | 0.106 | 1.47 | 0.67 | 7.5  | 3.0 | 15.6 | 3.6 | 33.6  | 6.2  | 7664 | 96  | 663 |
| LKZ-11-2  | 22 | -   | 92  | 0.0003  | 0.83 | 0.014 | 0.190 | 0.345 | 0.100 | 1.61 | 0.64 | 7.0  | 2.9 | 16.3 | 3.4 | 33.2  | 6.5  | 7756 | 94  | 632 |
| LKZ-12-1  | 13 | 61  | 88  | -       | 0.79 | 0.065 | 0.078 | 0.296 | 0.088 | 1.59 | 0.57 | 6.8  | 3.0 | 14.9 | 3.3 | 31.2  | 5.8  | 7380 | 95  | 665 |
| LKZ-12-2  | 31 | -   | 94  | 0.002   | 1.03 | 0.013 | 0.094 | 0.362 | 0.117 | 1.76 | 0.67 | 7.5  | 3.2 | 16.3 | 3.7 | 34.8  | 6.5  | 7702 | 100 | 648 |
| LKZ-13-2  | 29 | -   | 85  | 0.0005  | 0.86 | 0.009 | 0.180 | 0.221 | 0.056 | 1.39 | 0.61 | 6.7  | 3.0 | 14.8 | 3.3 | 30.6  | 5.5  | 7509 | 93  | 633 |
| LKZ-14-1  | 14 | 35  | 91  | -       | 0.96 | 0.012 | 0.173 | 0.293 | 0.050 | 1.54 | 0.55 | 7.3  | 3.0 | 15.7 | 3.5 | 33.8  | 6.3  | 7578 | 93  | 642 |
| LKZ-14-2  | 13 | -   | 90  | 0.004   | 0.80 | 0.012 | 0.076 | 0.234 | 0.112 | 1.32 | 0.54 | 7.4  | 2.8 | 14.6 | 3.3 | 31.0  | 5.9  | 7421 | 91  | 611 |
| LKZ-15-1  | 6  | -   | 82  | 0.0002  | 0.87 | 0.007 | 0.100 | 0.280 | 0.086 | 1.40 | 0.54 | 7.2  | 2.6 | 14.4 | 3.2 | 31.3  | 5.9  | 7831 | 98  | 650 |
| LKZ-15-2  | 37 | 112 | 85  | 0.001   | 0.83 | 0.041 | 0.211 | 0.349 | 0.088 | 1.54 | 0.62 | 7.2  | 2.9 | 14.6 | 3.2 | 30.5  | 5.8  | 7869 | 95  | 657 |
| LKZ-16-1  | 10 | -   | 79  | 0.005   | 0.83 | 0.013 | 0.046 | 0.235 | 0.058 | 1.47 | 0.57 | 6.9  | 2.6 | 14.1 | 3.1 | 29.1  | 5.4  | 7732 | 84  | 608 |
| LKZ-16-2  | 11 | 76  | 82  | 0.002   | 0.71 | 0.013 | 0.125 | 0.417 | 0.075 | 1.46 | 0.60 | 6.8  | 2.9 | 14.5 | 3.1 | 29.6  | 5.7  | 7968 | 87  | 599 |
| LKZ-43-1  | 12 | -   | 83  | 0.002   | 0.89 | 0.011 | 0.183 | 0.254 | 0.111 | 1.40 | 0.63 | 7.1  | 3.0 | 15.1 | 3.5 | 33.0  | 5.9  | 7955 | 92  | 619 |
| LKZ-44-2  | 16 | -   | 80  | 0.002   | 0.83 | 0.011 | 0.070 | 0.355 | 0.066 | 1.33 | 0.58 | 7.2  | 2.8 | 14.9 | 3.5 | 32.4  | 5.7  | 7803 | 96  | 657 |
| LKZ-45-1  | 8  | 13  | 80  | 0.001   | 0.85 | 0.012 | 0.132 | 0.297 | 0.080 | 1.55 | 0.58 | 7.1  | 2.7 | 14.5 | 3.2 | 31.2  | 5.5  | 7784 | 98  | 671 |
| LKZ-46-2  | 12 | 25  | 80  | -       | 0.87 | 0.003 | 0.138 | 0.303 | 0.086 | 1.43 | 0.56 | 7.0  | 2.7 | 14.6 | 3.3 | 32.1  | 5.8  | 7962 | 97  | 667 |
| LKZ-47-3  | 30 | 70  | 78  | 0.002   | 0.83 | 0.010 | 0.236 | 0.224 | 0.075 | 1.60 | 0.57 | 7.2  | 2.9 | 14.5 | 3.4 | 30.9  | 5.9  | 8039 | 96  | 661 |
| LKZ-61    | 23 | 78  | 79  | 0.007   | 0.81 | 0.011 | 0.219 | 0.313 | 0.124 |      |      |      |     |      |     |       |      |      |     |     |
