# Supplementary material
Source: MDPI journal article supplement (https://www.mdpi.com/2075-163X/9/5/325)
Supplement: s1 [file s1]

Table S2. HR-SIMS (Cameca 1280) oxygen isotope data for the analysed zircons.

| Spot No.  | Date             | IP (nA) | <sup>16</sup> O intensity (cps) | <sup>18</sup> O/ <sup>16</sup> O Mean | Measured $\delta^{18}\text{O}_{\text{V-SMOW}} (\text{‰})$ | 2SE  | IMF   | Corrected $\delta^{18}\text{O}_{\text{V-SMOW}} (\text{‰})$ | X position | Y position | DTFA_X | DTFA_Y | DTCA_X |
|-----------|------------------|---------|---------------------------------|---------------------------------------|-----------------------------------------------------------|------|-------|------------------------------------------------------------|------------|------------|--------|--------|--------|
| 91500@1   | 2018-11-14 10:24 | 1.57    | 2.076E+9                        | 2.036E-3                              | 15.30                                                     | 0.26 | -5.09 | 10.22                                                      | -544       | 1550       | -7     | -19    | 6      |
| 91500@2   | 2018-11-14 10:44 | 1.56    | 2.059E+9                        | 2.035E-3                              | 15.10                                                     | 0.38 | -5.09 | 10.01                                                      | -432       | 1529       | -7     | -21    | 9      |
| 91500@3   | 2018-11-14 11:03 | 1.55    | 2.047E+9                        | 2.036E-3                              | 15.17                                                     | 0.28 | -5.09 | 10.08                                                      | 30         | 1547       | -10    | -19    | 7      |
| 91500@4   | 2018-11-14 11:20 | 1.55    | 2.042E+9                        | 2.035E-3                              | 14.88                                                     | 0.22 | -5.09 | 9.80                                                       | 272        | 1611       | -9     | -18    | 5      |
| 91500@5   | 2018-11-14 11:40 | 1.54    | 2.033E+9                        | 2.035E-3                              | 14.91                                                     | 0.34 | -5.09 | 9.83                                                       | 1482       | 1929       | -11    | -15    | 4      |
| 91500@6   | 2018-11-14 11:59 | 1.53    | 2.023E+9                        | 2.035E-3                              | 14.99                                                     | 0.20 | -5.09 | 9.90                                                       | 2576       | 1991       | -11    | -14    | 2      |
| 91500@7   | 2018-11-14 12:16 | 1.53    | 2.035E+9                        | 2.036E-3                              | 15.24                                                     | 0.27 | -5.09 | 10.16                                                      | 2638       | 52         | -17    | -34    | 3      |
| 91500@8   | 2018-11-14 12:29 | 1.52    | 2.013E+9                        | 2.036E-3                              | 15.19                                                     | 0.30 | -5.09 | 10.10                                                      | 2058       | -7         | -16    | -35    | 4      |
| 91500@9   | 2018-11-14 12:49 | 1.51    | 2.015E+9                        | 2.036E-3                              | 15.28                                                     | 0.27 | -5.09 | 10.19                                                      | 1536       | -77        | -16    | -36    | 3      |
| 91500@10  | 2018-11-14 13:08 | 1.51    | 1.999E+9                        | 2.036E-3                              | 15.41                                                     | 0.31 | -5.09 | 10.33                                                      | 778        | -196       | -14    | -38    | 6      |
| 91500@11  | 2018-11-14 13:31 | 1.49    | 2.001E+9                        | 2.036E-3                              | 15.24                                                     | 0.24 | -5.09 | 10.15                                                      | 166        | -299       | -12    | -39    | 6      |
| Average   |                  |         |                                 |                                       | 15.16                                                     |      |       |                                                            |            |            |        |        |        |
| SD        |                  |         |                                 |                                       | 0.17                                                      |      |       |                                                            |            |            |        |        |        |
| LKZ-1@1   | 2018-11-14 10:27 | 1.57    | 2.061E+9                        | 2.037E-3                              | 15.67                                                     | 0.18 | -5.09 | 10.58                                                      | -2156      | 2988       | 3      | -5     | 9      |
| LKZ-1@2   | 2018-11-14 10:30 | 1.57    | 2.061E+9                        | 2.037E-3                              | 15.87                                                     | 0.28 | -5.09 | 10.79                                                      | -2414      | 3043       | 4      | -5     | 8      |
| LKZ-1@3   | 2018-11-14 10:33 | 1.57    | 2.061E+9                        | 2.036E-3                              | 15.61                                                     | 0.25 | -5.09 | 10.52                                                      | -1146      | 3032       | 0      | -4     | 7      |
| LKZ-1@4   | 2018-11-14 10:41 | 1.56    | 2.063E+9                        | 2.036E-3                              | 15.45                                                     | 0.34 | -5.09 | 10.37                                                      | -2309      | 2298       | 1      | -15    | 9      |
| LKZ-1@5   | 2018-11-14 10:47 | 1.56    | 2.067E+9                        | 2.037E-3                              | 15.68                                                     | 0.43 | -5.09 | 10.59                                                      | -2440      | 2193       | -1     | -14    | 10     |
| LKZ-1@6   | 2018-11-14 10:50 | 1.56    | 2.073E+9                        | 2.037E-3                              | 15.68                                                     | 0.33 | -5.09 | 10.60                                                      | -1692      | 2186       | -1     | -14    | 8      |
| LKZ-1@7   | 2018-11-14 10:52 | 1.56    | 2.047E+9                        | 2.037E-3                              | 16.04                                                     | 0.28 | -5.09 | 10.96                                                      | -1362      | 2287       | 0      | -12    | 8      |
| LKZ-1@8   | 2018-11-14 10:58 | 1.56    | 2.050E+9                        | 2.037E-3                              | 15.69                                                     | 0.45 | -5.09 | 10.60                                                      | -1020      | 2381       | -2     | -10    | 8      |
| LKZ-1@9   | 2018-11-14 11:06 | 1.54    | 2.044E+9                        | 2.037E-3                              | 15.64                                                     | 0.32 | -5.09 | 10.56                                                      | -183       | 2394       | -6     | -11    | 5      |
| LKZ-1@10  | 2018-11-14 11:09 | 1.55    | 2.053E+9                        | 2.037E-3                              | 15.77                                                     | 0.23 | -5.09 | 10.69                                                      | 20         | 2555       | -5     | -8     | 5      |
| LKZ-1@11  | 2018-11-14 11:12 | 1.55    | 2.044E+9                        | 2.037E-3                              | 15.85                                                     | 0.19 | -5.09 | 10.77                                                      | -352       | 3178       | -1     | -1     | 6      |
| LKZ-1@12  | 2018-11-14 11:17 | 1.55    | 2.037E+9                        | 2.037E-3                              | 15.97                                                     | 0.22 | -5.09 | 10.88                                                      | -546       | 3093       | -1     | -3     | 6      |
| LKZ-1@13  | 2018-11-14 11:26 | 1.54    | 2.033E+9                        | 2.036E-3                              | 15.56                                                     | 0.21 | -5.09 | 10.48                                                      | 596        | 3302       | -3     | 1      | 4      |
| LKZ-1@14  | 2018-11-14 11:29 | 1.54    | 2.021E+9                        | 2.037E-3                              | 15.76                                                     | 0.12 | -5.09 | 10.68                                                      | 762        | 3278       | -3     | 1      | 3      |
| LKZ-1@15  | 2018-11-14 11:31 | 1.54    | 2.039E+9                        | 2.037E-3                              | 15.72                                                     | 0.29 | -5.09 | 10.63                                                      | 1019       | 2627       | -8     | -7     | 3      |
| LKZ-1@16  | 2018-11-14 11:37 | 1.54    | 2.030E+9                        | 2.037E-3                              | 15.71                                                     | 0.28 | -5.09 | 10.62                                                      | 1274       | 2605       | -7     | -7     | 4      |
| LKZ-1@17  | 2018-11-14 11:42 | 1.54    | 2.014E+9                        | 2.037E-3                              | 15.63                                                     | 0.23 | -5.09 | 10.54                                                      | 1416       | 3349       | -6     | 1      | 2      |
| LKZ-1@18  | 2018-11-14 11:48 | 1.53    | 2.010E+9                        | 2.037E-3                              | 15.90                                                     | 0.31 | -5.09 | 10.81                                                      | 2246       | 3676       | -2     | 5      | 1      |
| LKZ-1@19  | 2018-11-14 11:51 | 1.53    | 2.022E+9                        | 2.037E-3                              | 15.83                                                     | 0.17 | -5.09 | 10.74                                                      | 2262       | 2834       | -7     | -5     | 1      |
| LKZ-1@20  | 2018-11-14 11:53 | 1.54    | 2.031E+9                        | 2.037E-3                              | 15.65                                                     | 0.31 | -5.09 | 10.56                                                      | 2010       | 2726       | -8     | -5     | 2      |
| Average   |                  |         |                                 |                                       | 15.73                                                     |      |       | 10.65                                                      |            |            |        |        |        |
| SD        |                  |         |                                 |                                       | 0.14                                                      |      |       | 0.14                                                       |            |            |        |        |        |
| Penglai@1 | 2018-11-14 10:35 | 1.57    | 2.079E+9                        | 2.025E-3                              | 10.03                                                     | 0.18 | -5.09 | 4.95                                                       | -2342      | 328        | -3     | -34    | 11     |
| Penglai@2 | 2018-11-14 10:55 | 1.56    | 2.064E+9                        | 2.026E-3                              | 10.28                                                     | 0.31 | -5.09 | 5.20                                                       | -2199      | 396        | -1     | -32    | 11     |
| Penglai@3 | 2018-11-14 11:15 | 1.55    | 2.060E+9                        | 2.027E-3                              | 10.64                                                     | 0.24 | -5.09 | 5.55                                                       | -1882      | 181        | -5     | -35    | 12     |
| Penglai@4 | 2018-11-14 11:34 | 1.54    | 2.053E+9                        | 2.026E-3                              | 10.29                                                     | 0.31 | -5.09 | 5.20                                                       | -1692      | 398        | -3     | -32    | 10     |
| Penglai@5 | 2018-11-14 11:56 | 1.53    | 2.043E+9                        | 2.026E-3                              | 10.38                                                     | 0.25 | -5.09 | 5.29                                                       | -896       | 402        | -8     | -32    | 8      |
| Penglai@6 | 2018-11-14 12:13 | 1.52    | 2.034E+9                        | 2.026E-3                              | 10.61                                                     | 0.36 | -5.09 | 5.52                                                       | -883       | 617        | -9     | -29    | 9      |
| Penglai@7 | 2018-11-14 12:32 | 1.52    | 2.022E+9                        | 2.026E-3                              | 10.55                                                     | 0.30 | -5.09 | 5.46                                                       | -121       | 505        | -10    | -31    | 7      |
| Penglai@8 | 2018-11-14 12:57 | 1.51    | 2.010E+9                        | 2.026E-3                              | 10.61                                                     | 0.22 | -5.09 | 5.53                                                       | 101        | 632        | -11    | -29    | 8      |
| Penglai@9 | 2018-11-14 13:20 | 1.51    | 2.006E+9                        | 2.026E-3                              | 10.21                                                     | 0.37 | -5.09 | 5.12                                                       | 860        | 710        | -12    | -28    | 4      |
| Penglai@1 | 2018-11-13 14:35 | 1.73    | 2.259E+9                        | 2.028E-3                              | 11.55                                                     | 0.31 | -6.09 | 5.46                                                       | 835        | -209       | -18    | -45    | 4      |
| Penglai@2 | 2018-11-13 15:01 | 1.71    | 2.227E+9                        | 2.029E-3                              | 12.06                                                     | 0.20 | -6.09 | 5.97                                                       | 1746       | -262       | -17    | -42    | 2      |
| Penglai@3 | 2018-11-13 15:25 | 1.69    | 2.208E+9                        | 2.029E-3                              | 11.79                                                     | 0.23 | -6.09 | 5.70                                                       | 708        | -220       | -19    | -45    | 4      |
| Penglai@4 | 2018-11-13 16:04 | 1.68    | 2.242E+9                        | 2.027E-3                              | 10.73                                                     | 0.21 | -6.09 | 4.64                                                       | -200       | -138       | -16    | -46    | 6      |
| Penglai@5 | 2018-11-13 16:34 | 1.64    | 2.163E+9                        | 2.029E-3                              | 12.01                                                     | 0.20 | -6.09 | 5.92                                                       | -963       | -46        | -16    | -46    | 8      |
| Penglai@1 | 2018-11-13 20:42 | 1.78    | 2.326E+9                        | 2.029E-3                              | 11.69                                                     | 0.16 | -6.54 | 5.15                                                       | -749       | 444        | 6      | -47    | 17     |
| Penglai@2 | 2018-11-13 21:07 | 1.76    | 2.308E+9                        | 2.029E-3                              | 11.83                                                     | 0.31 | -6.54 | 5.29                                                       | 811        | 578        | -4     | -44    | 12     |
| Penglai@3 | 2018-11-13 21:31 | 1.75    | 2.298E+9                        | 2.028E-3                              | 11.29                                                     | 0.21 | -6.54 | 4.75                                                       | 1939       | 514        | -12    | -45    | 11     |
| Penglai@1 | 2018-11-15 10:25 | 1.45    | 1.911E+9                        | 2.026E-3                              | 10.56                                                     | 0.29 | -5.28 | 5.28                                                       | -1314      | -483       | 4      | -12    | 12     |
| Penglai@2 | 2018-11-15 10:46 | 1.45    | 1.916E+9                        | 2.026E-3                              | 10.31                                                     | 0.15 | -5.28 | 5.03                                                       | -1154      | -494       | 2      | -13    | 8      |
| Penglai@3 | 2018-11-15 11:22 | 1.43    | 1.881E+9                        | 2.026E-3                              | 10.53                                                     | 0.25 | -5.28 | 5.25                                                       | -898       | -529       | 0      | -14    | 10     |
| Penglai@4 | 2018-11-15 11:55 | 1.43    | 1.881E+9                        | 2.027E-3                              | 10.63                                                     | 0.40 | -5.28 | 5.35                                                       | -554       | -405       | -1     | -15    | 7      |
| Penglai@5 | 2018-11-15 12:28 | 1.42    | 1.862E+9                        | 2.026E-3                              | 10.45                                                     | 0.23 | -5.28 | 5.17                                                       | 214        | -397       | -3     | -14    | 7      |
| Penglai@6 | 2018-11-15 12:42 | 1.41    | 1.876E+9                        | 2.025E-3                              | 10.09                                                     | 0.20 | -5.28 | 4.81                                                       | -437       | -289       | 1      | -13    | 9      |
| Average   |                  |         |                                 |                                       | 10.83                                                     |      |       | 5.29                                                       |            |            |        |        |        |
| SD        |                  |         |                                 |                                       | 0.66                                                      |      |       | 0.34                                                       |            |            |        |        |        |
