# Supplementary material
Source: MDPI journal article supplement (https://www.mdpi.com/2075-163X/9/5/325)
Supplement: s1 [file s1]

Table S1. SHRIMP U-Th-Pb results for the Plešovice zircon.

| Spot No. | $^{206}\text{Pb}^1$ | $^{206}\text{Pb}/^{238}\text{U}^2$ | $\pm\%$ | $^{207}\text{Pb}/^{206}\text{Pb}^2$ | $\pm\%$ | Th    | U     | Disc. | Date <sup>3</sup> |
|----------|---------------------|------------------------------------|---------|-------------------------------------|---------|-------|-------|-------|-------------------|
|          | (%)                 |                                    |         |                                     |         | (ppm) | (ppm) | %     | (Ma)              |
| PLE_1.1  | 0.06                | 0.1335                             | 2.20    | 0.0536                              | 0.87    | 60    | 636   | -1.4  | 339.6 ± 2.6       |
| PLE_2.1  | 0.03                | 0.1330                             | 2.36    | 0.0537                              | 0.94    | 53    | 559   | 2.6   | 340.7 ± 2.6       |
| PLE_3.1  |                     | 0.1364                             | 2.24    | 0.0538                              | 0.63    | 136   | 1225  | 7.3   | 341.1 ± 2.6       |
| PLE_4.1  | 0.09                | 0.1265                             | 2.01    | 0.0541                              | 1.03    | 41    | 485   | 2.6   | 338.4 ± 2.7       |
| PLE_5.1  |                     | 0.1266                             | 2.56    | 0.0535                              | 1.02    | 48    | 492   | 5.2   | 337.7 ± 2.7       |
| PLE_6.1  | 0.03                | 0.1222                             | 2.67    | 0.0518                              | 0.90    | 69    | 689   | -27.0 | 341.4 ± 2.6       |
| PLE_7.1  | 0.07                | 0.1234                             | 3.01    | 0.0547                              | 1.16    | 32    | 390   | 10.9  | 337.2 ± 5.2       |
| PLE_8.1  | 0.13                | 0.1272                             | 2.06    | 0.0532                              | 1.27    | 27    | 353   | -17.2 | 341.6 ± 2.9       |
| PLE_9.1  | 0.03                | 0.1289                             | 2.54    | 0.0531                              | 0.67    | 138   | 1388  | -5.7  | 341.8 ± 2.7       |
| PLE_10.1 | 0.03                | 0.1295                             | 2.63    | 0.0530                              | 1.03    | 46    | 557   | -6.5  | 339.1 ± 2.8       |
| PLE_11.1 | 0.14                | 0.1287                             | 2.07    | 0.0550                              | 0.97    | 52    | 583   | 8.2   | 336.7 ± 2.7       |
| PLE_12.1 |                     | 0.1264                             | 1.85    | 0.0545                              | 1.28    | 27    | 333   | 16.1  | 338.2 ± 2.8       |
| PLE_13.1 | 0.04                | 0.1211                             | 3.10    | 0.0544                              | 1.09    | 27    | 427   | 10.1  | 336.3 ± 2.7       |
| PLE_14.1 | 0.06                | 0.1246                             | 2.84    | 0.0534                              | 1.14    | 34    | 405   | -2.8  | 333.2 ± 2.9       |
| PLE_15.1 |                     | 0.1254                             | 2.89    | 0.0537                              | 0.87    | 65    | 669   | 8.2   | 335.9 ± 2.6       |

<sup>1</sup>  $^{204}\text{Pb}$ -based common  $^{206}\text{Pb}$  proportion; <sup>2</sup> Uncorrected data; <sup>3</sup>  $^{207}\text{Pb}$ -corrected  $^{206}\text{Pb}/^{238}\text{U}$  date
