# Supplementary material
Source: MDPI journal article supplement (https://www.mdpi.com/2075-163X/9/5/325)

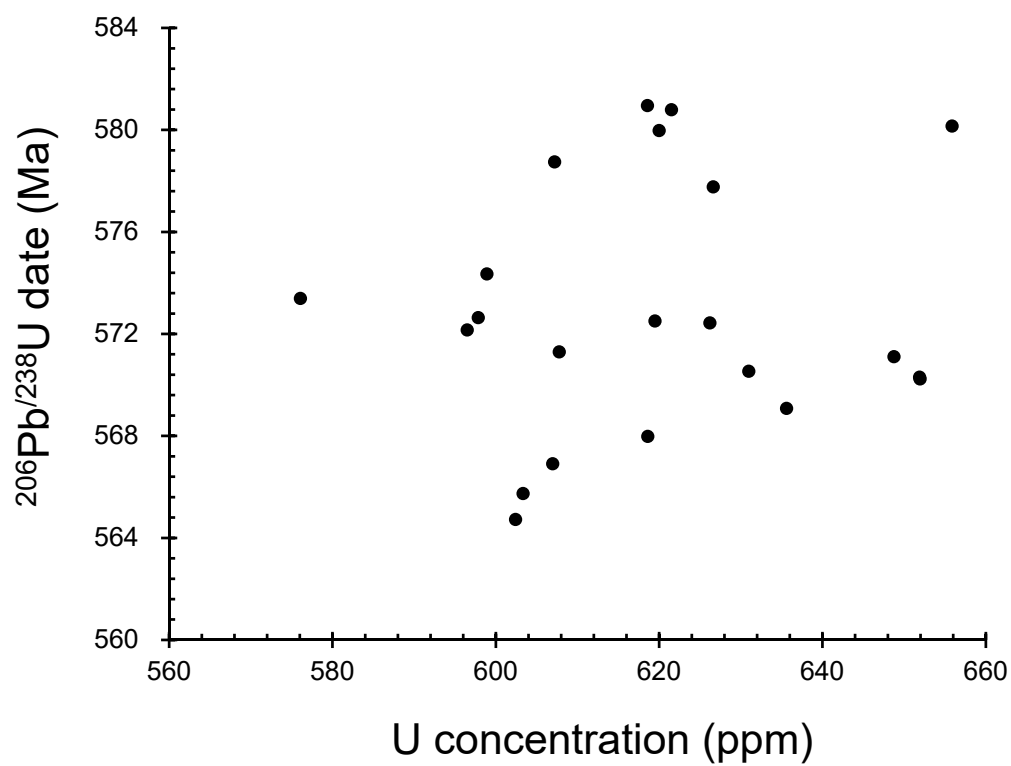

**Figure S1.** Plot of  $^{206}\text{Pb}/^{238}\text{U}$  dates and U concentrations for the SHRIMP spots of the LKZ-1 zircon.

Supplement: s1 [file s1]

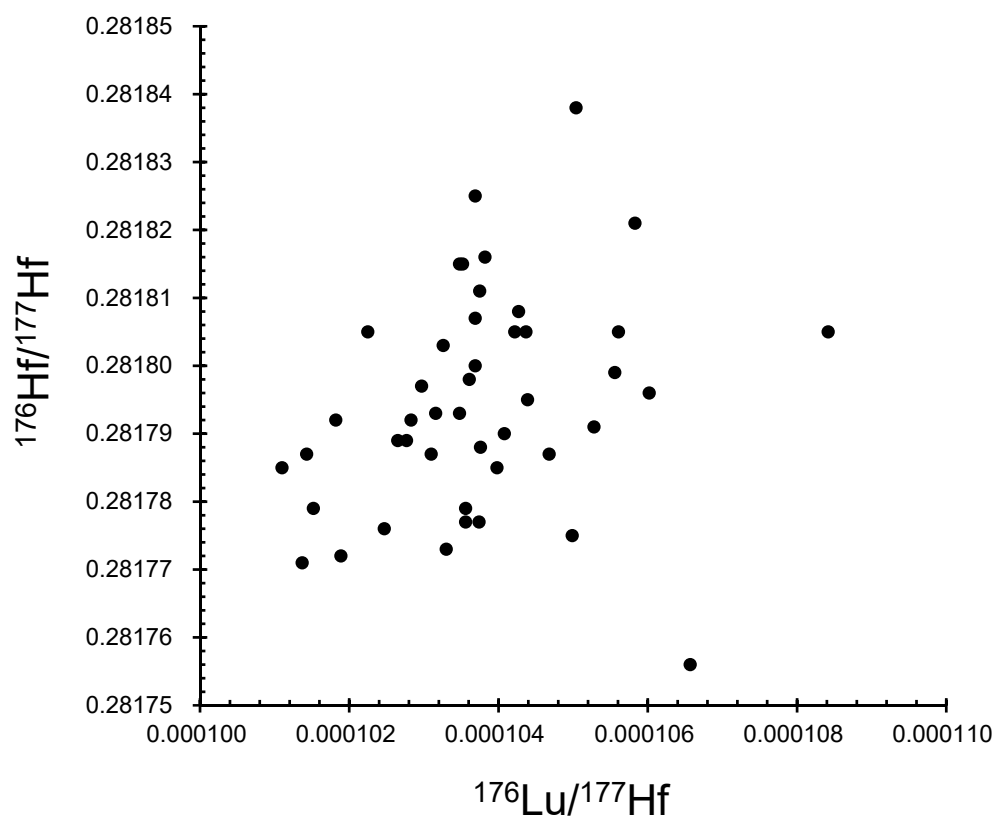

**Figure S2.**  $^{176}\text{Hf}/^{177}\text{Hf}$  vs.  $^{176}\text{Lu}/^{177}\text{Hf}$  plot for the LKZ-1 zircon.

Supplement: s1 [file s1]
